# Supplementary material for: The macroscopic shape of assemblies formed from microparticles based on host–guest interaction dependent on the guest content
Source: PubMed Central journal article supplement (PMC7973530; doi:10.1038/s41598-021-85816-z), 2021-03-18
Supplement: 41598_2021_85816_MOESM1_ESM.pdf [file 41598_2021_85816_MOESM1_ESM.pdf]

Supporting Information for

**The macroscopic shape of assemblies formed from  
microparticles based on host–guest interaction dependent on  
the guest content**

Takahiro Itami<sup>1</sup>, Akihito Hashidzume<sup>1\*</sup>, Yuri Kamon<sup>1</sup>, Hiroyasu Yamaguchi<sup>1</sup>, and  
Akira Harada<sup>2\*</sup>

<sup>1</sup>Graduate School of Science, Osaka University, 1-1 Machikaneyama-cho, Toyonaka, Osaka 560-  
0043, Japan

<sup>2</sup>The Institute of Scientific and Industrial Research, Osaka University, 8-1 Mihogaoka, Ibaraki, Osaka  
567-0047, Japan

\*Corresponding author.

*E-mail address:* hashidzume@chem.sci.osaka-u.ac.jp (AHashidzume), harada@chem.sci.osaka-  
u.ac.jp (AHarada).

**Table S1. Results of the interaction of  $\beta$ CD( $x$ )-SAP with Ad( $y$ )-SAP microparticles<sup>a</sup>.**

| $x$ / mol% | $y$ / mol% |     |      |      |
|------------|------------|-----|------|------|
|            | 5.2        | 7.1 | 10.7 | 15.1 |
| 16.2       | –          | –   | –    | –    |
| 22.3       | –          | –   | –    | –    |
| 26.7       | +          | +   | +    | +    |

*a.* “+” and “–” denote assembly formation and no assembly formation, respectively.

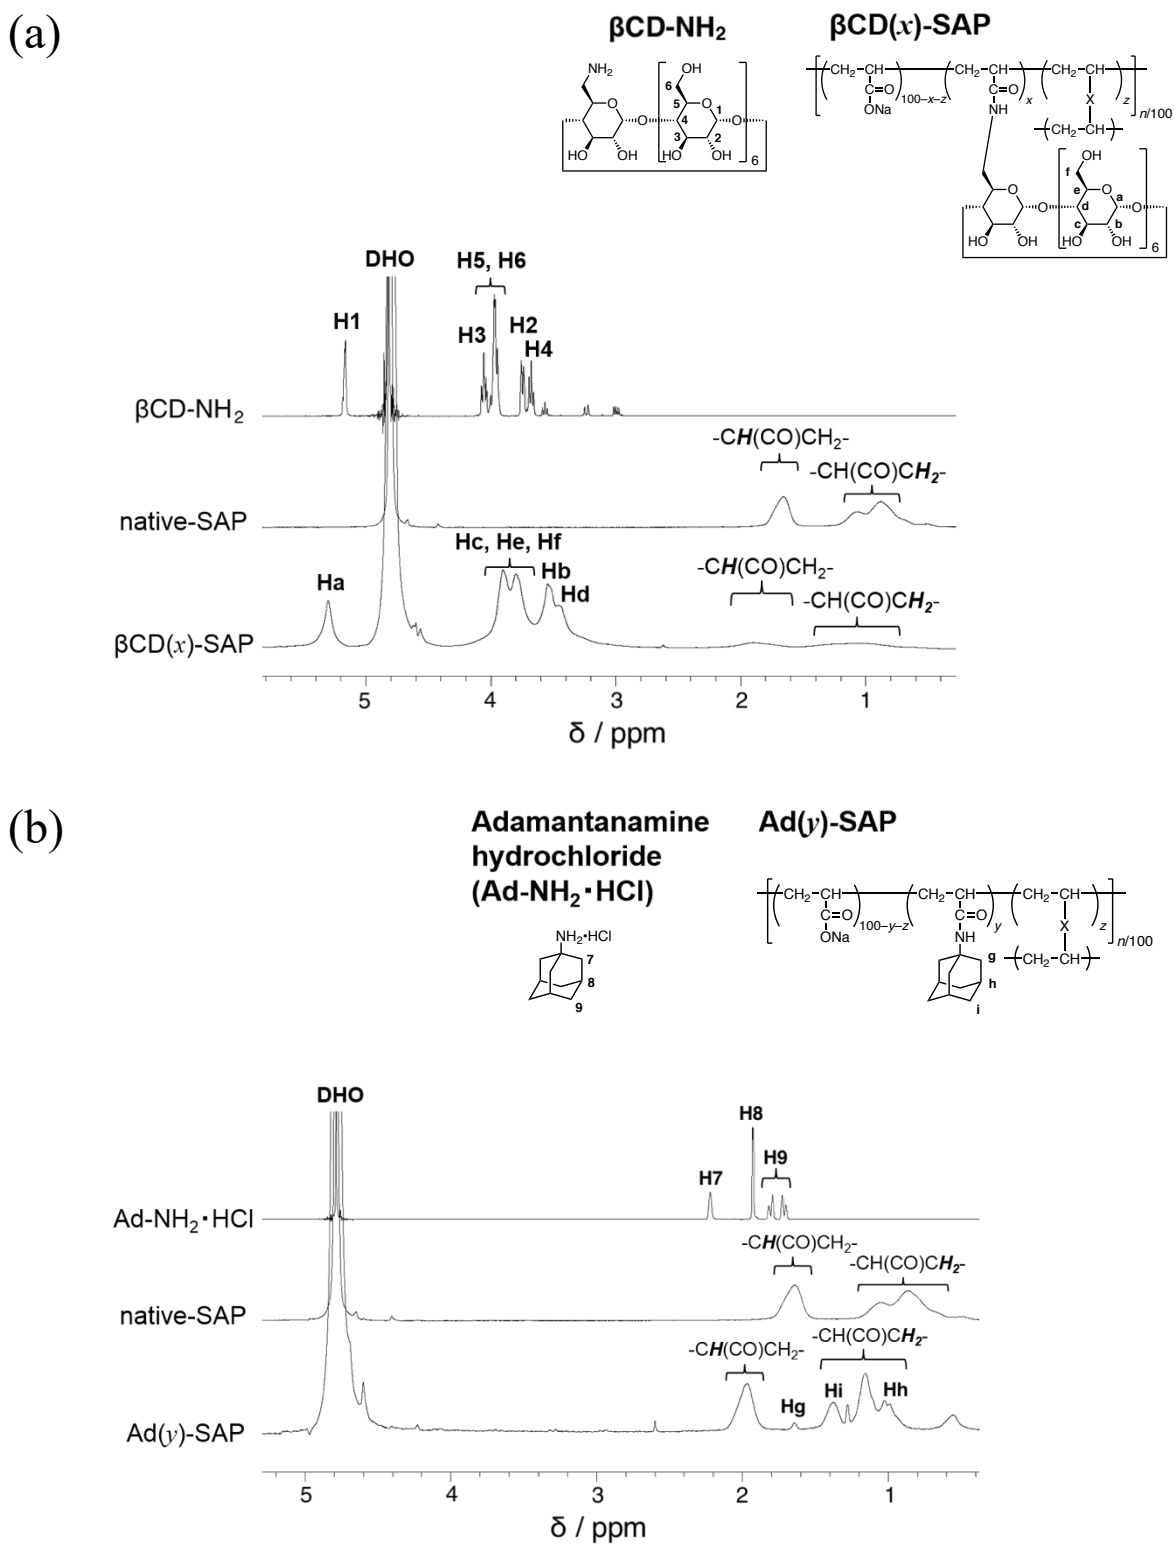

**Figure S1.** <sup>1</sup>H FGMAS NMR spectra for  $\beta$ CD-NH<sub>2</sub>, Ad-NH<sub>2</sub>·HCl, unmodified SAP,  $\beta$ CD(x)-SAP, and Ad(y)-SAP. The SAP microparticles were swollen with D<sub>2</sub>O.

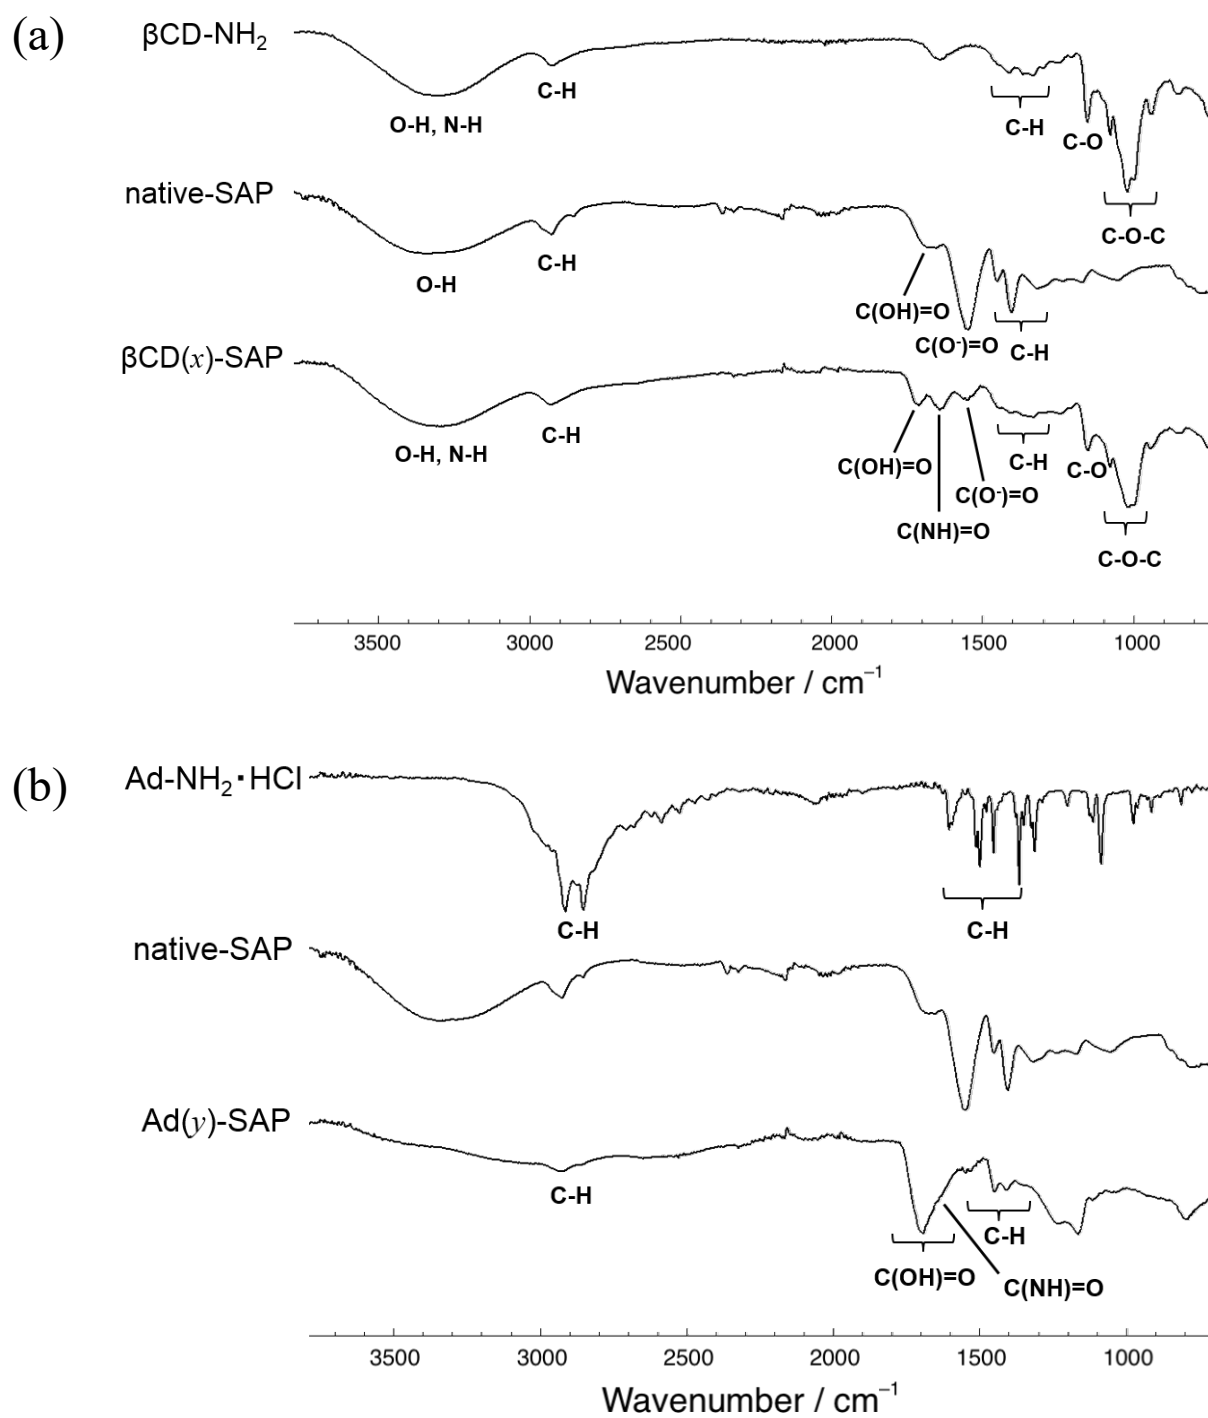

**Figure S2.** ATR FT/IR spectra for  $\beta$ CD-NH<sub>2</sub>, Ad-NH<sub>2</sub>·HCl, unmodified SAP,  $\beta$ CD(x)-SAP, and Ad( $\gamma$ )-SAP.
